# Supplementary material
Source: publisher figshare collection journal article supplement (https://sage.figshare.com/ndownloader/files/13638350)
Supplement: Supplementary file 1 [file 13638350]

# Hospice Questionnaire

---

Age

---

Gender

- Female
- Male
- Other
- Prefer not to answer

---

What is your highest qualification of education?'

- High School
- Associate's
- Bachelor's
- Master's
- Doctoral

---

Which state do you work in?

- Alabama
- Alaska
- Arizona
- Arkansas
- California
- Colorado
- Connecticut
- Delaware
- Florida
- Georgia
- Hawaii
- Idaho
- Illinois
- Indiana
- Iowa
- Kansas
- Kentucky
- Louisiana
- Maine
- Maryland
- Massachusetts
- Michigan
- Minnesota
- Mississippi
- Missouri
- Montana
- Nebraska
- Nevada
- New Hampshire
- New Jersey
- New Mexico
- New York
- North Carolina
- North Dakota
- Ohio
- Oklahoma
- Oregon
- Pennsylvania
- Rhode Island
- South Carolina
- South Dakota
- Tennessee
- Texas
- Utah
- Vermont
- Virginia
- Washington
- West Virginia
- Wisconsin
- Wyoming

---

What type(s) of hospice facility do you currently work in?

- Inpatient hospital
- Home health care
- Hospice care center
- Skilled nursing
- Other

---

If you selected "Other", can you please specify what setting(s) you currently work in?

---

---

What is your current position?

- Physician
- Registered Nurse
- Social Worker
- Physical Therapist
- Speech Language Pathologist
- Occupational Therapist
- Other

---

If you selected "Other", can you please specify what your professional role is in end of life care?

---

---

How many years of experience do you have in your current hospice setting?

---

---

Please list any previous positions you have held at various hospice setting(s):

---

---

Have you come across the term occupational therapy before?

- Yes
- No

---

How did you first hear about occupational therapy?

- University curriculum
- Work practice
- Reading
- Internet
- From a friend
- Other

---

If you selected "Other", can you please specify how you first heard of occupational therapy?

---

---

If you selected "University Curriculum", can you please indicate which educational level occupational therapy was addressed in? (e.g. high school, associate's, bachelor's, master's, doctoral)

---

---

Do you work with an occupational therapist within your healthcare team?

- Yes
- No

---

How often do you work with an occupational therapist?

- Rarely
- Occasionally
- Frequently
- Most of the time

**Please select the most appropriate answer:**

|                                                                                       | Strongly Agree        | Agree                 | Neutral               | Disagree              | Strongly Disagree                |
|---------------------------------------------------------------------------------------|-----------------------|-----------------------|-----------------------|-----------------------|----------------------------------|
| I feel knowledgeable about occupational therapy                                       | <input type="radio"/> | <input type="radio"/> | <input type="radio"/> | <input type="radio"/> | <input checked="" type="radio"/> |
| I feel I have enough knowledge to explain occupational therapy to other professionals | <input type="radio"/>            |
| Occupational therapy is a vital profession in the hospice healthcare team             | <input type="radio"/>            |

**Please select the most appropriate answer:**

|                                                                                                          | Strongly agree        | Agree                 | Neutral               | Disagree              | Strongly Disagree                |
|----------------------------------------------------------------------------------------------------------|-----------------------|-----------------------|-----------------------|-----------------------|----------------------------------|
| I feel that occupational therapy plays a significant role in the facility/agency that I work in          | <input type="radio"/> | <input type="radio"/> | <input type="radio"/> | <input type="radio"/> | <input checked="" type="radio"/> |
| I feel that occupational therapy is utilized to its full potential in hospice care                       | <input type="radio"/>            |
| I feel that more emphasis on the role of occupational therapy is needed in the facility/agency I work in | <input type="radio"/>            |

---

Please check any of the boxes that you believe represent the role of occupational therapy:

- Training for activities of daily living (ADLs)
- Respiratory therapy
- Massage
- Pain management via use of modalities
- Manual muscle testing
- Physical exercise
- Hand therapy
- Cooking/Meal Preparation
- Interest & leisure exploration
- Feeding
- Ergonomics
- Family/caregiver education
- Functional mobility
- Splints/Orthoses
- Rest & sleep
- Analysis of tasks/activities
- Home safety evaluation
- Increasing quality of life
- Facilitate attainment of end of life goals
- Teach activity pacing & energy conservation
- Craft/Recreation activities
- Range of motion
- Task modification
- Speech & articulation skills
- Mental health counseling
- Bereavement counseling
- Upper extremity rehabilitation
- Drug prescription

---

Was there ever a time that you thought a patient would benefit from occupational therapy services, but did not receive OT intervention?

- Yes  
 No

---

Please reflect on your experiences in hospice care. Are you able to identify a time that a client(s) would have benefited from occupational therapy services, however, services were not provided? Please explain:

---



---

Thank you for your time and participation!

This questionnaire was adapted with permission from Alheresh, R., & Nikopoulos, C. K. (2011). The role of the occupational therapist in Jordan: a survey of the members of the healthcare team exploring their knowledge about occupational therapy in rehabilitation hospitals. *Disability & Rehabilitation*, 33(9), 778-786.
